# Supplementary material for: Removal of Fecal Indicators, Pathogenic Bacteria, Adenovirus, Cryptosporidium and Giardia (oo)cysts in Waste Stabilization Ponds in Northern and Eastern Australia
Source: MDPI journal article supplement (doi:10.3390/ijerph13010096), 2016-01-02

# Supplementary Materials: Removal of Fecal Indicators, Pathogenic Bacteria, Adenovirus, *Cryptosporidium* and *Giardia* (oo)cysts in Waste Stabilization Ponds in Northern and Eastern Australia

Maxim Sheludchenko, Anna Padovan, Mohammad Katouli and Helen Stratton

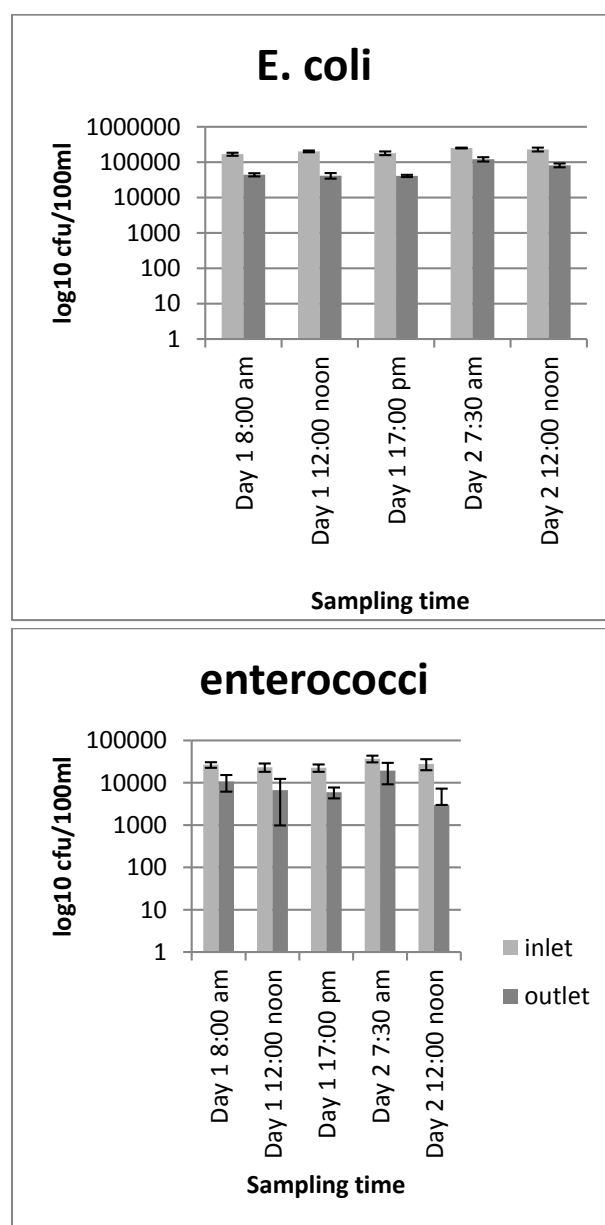

**Figure S1.** Concentrations of *E. coli* and enterococci at the inlet and outlet of WSP4 over a day and a half. Error bars are standard deviation taken from triplicate samples.

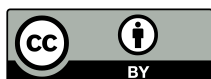

Supplement: s1 [file s1]
